# Supplementary material for: Revealing region-specific biofilm viscoelastic properties by means of a micro-rheological approach
Source: PubMed Central journal article supplement (PMC5460257; doi:10.1038/s41522-016-0005-y), 2016-12-05

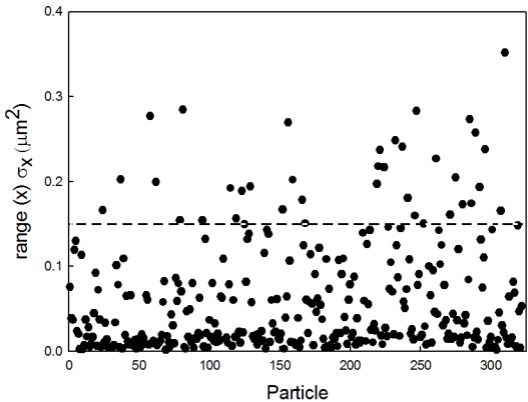

Supplement: 41522_2016_5_MOESM3_ESM.pdf [file 41522_2016_5_MOESM3_ESM.pdf]
